# Supplementary material for: Risk Factors for Alloimmunisation after red blood Cell Transfusions (R-FACT): a case cohort study
Source: PubMed Central journal article supplement — BMJ Open. 2012 May 4;2(3):e001150. doi: 10.1136/bmjopen-2012-001150 (PMC3358625; doi:10.1136/bmjopen-2012-001150), 2012-05-04
Supplement: bmjopen-2012-001150-s1.pdf [file bmjopen-2012-001150-s1.pdf]

## Funding Statement

This work was supported by Sanquin Blood Supply, the Netherlands- grant number PPOC-08-006. Sanquin is a not-for-profit national blood supply organization, with a dedicated scientific Research branch.

Details on Sanquin Blood supply- [www.sanquin.nl](http://www.sanquin.nl)
